# Supplementary material for: Comparative analysis of MAPK and MKK gene families reveals differential evolutionary patterns in Brachypodium distachyon inbred lines
Source: PeerJ. 2021 Apr 6;9:e11238. doi: 10.7717/peerj.11238 (PMC8034371; doi:10.7717/peerj.11238)
Supplement: Supplemental Information 19 [file peerj-09-11238-s019.xlsx]

## Sheet: raw data
	leaf blade									leaf sheath									stem									root									spikelet
	Bd21			TR8i			Bd30-1			Bd21			TR8i			Bd30-1			Bd21			TR8i			Bd30-1			Bd21			TR8i			Bd30-1			Bd21			TR8i			Bd30-1
Actin	18.763	18.7268	19.3632	15.9367	16.1954	15.3712	20.5323	21.2585	20.6876	18.1356	18.6557	18.958	17.7467	16.6791	17.8327	21.5005	21.5478	20.739	18.8585	19.1506	18.8646	16.4688	16.1392	15.744	20.8276	20.8648	20.7017	28.7978	27.8582	27.962	27.3151	27.1422	27.2539	26.4375	26.8551	26.6924	20.0661	20.2845	19.6901	36.391	35.9399	35.8914	20.3151	20.552	19.8796
MPK3	21.3189	21.0268	21.0921	19.109	18.7969	18.85	22.2266	23.6023	22.8468	21.1712	20.7798	20.7661	22.1774	22.2644	22.223	26.8801	26.9473	26.9746	22.3209	22.3386	22.296	21.7381	21.2401	21.2953	25.1346	25.4645	25.0885	27.8349	27.0199	27.4513	33.8313	33.5563	33.9221	29.6256	29.8067	29.1903	25.8513	25.9336	25.4341	24.5965	24.8441	24.9603	25.2539	24.9509	24.3137
MPK4	23.0078	22.7422	22.932	20.4856	20.3936	20.6129	21.3586	21.1738	21.1285	21.9444	21.8943	21.8148	22.0664	22.0527	22.1505	21.7391	21.6292	21.0334	23.0865	22.7784	22.8499	20.2202	20.1634	20.2722	21.6836	21.9726	21.4076	26.5783	26.6005	26.8086	29.0891	29.7982	29.7514	36.856	36.9774	36.9408	22.463	22.4261	22.1334	22.7064	22.9359	22.5159	22.0681	22.7417	22.8787
MPK6	21.1172	22.1143	21.3958	20.8188	20.0364	19.901	21.825	22.0125	21.8891	20.9539	20.9065	20.8619	22.1523	22.0655	22.1469	23.0346	22.2688	22.3713	22.9976	23.0642	22.5152	19.9546	19.609	19.5549	23.4794	23.9621	23.0821	29.694	29.8221	29.5059	35.0063	35.6881	35.3496	42.6881	42.3496	42.002	23.1604	22.851	22.6174	23.9673	23.6284	23.7247	22.4155	21.8536	22.1601
MPK7-1	24.2342	23.3883	23.4197	22.7795	22.2858	22.2442	23.3596	23.412	24.3787	23.2365	22.7758	22.7042	23.2235	23.4724	22.978	24.0995	24.044	24.9402	23.7111	22.959	23.0621	21.9241	21.4911	21.4735	23.6444	23.4307	23.6672	29.0336	29.0044	28.6518	34.9654	34.8244	35.9788	31.8541	31.9319	31.4353	24.2951	24.3021	25.3479	24.5714	24.9346	24.5979	23.9332	23.8521	24.4141
MPK11	21.1286	20.9529	21.2812	19.6481	19.3734	19.5798	23.1927	23.699	23.2143	21.3619	21.4805	21.6958	22.7461	22.2351	22.5561	25.1624	25.116	25.5231	22.5139	22.5996	22.7677	21.2482	20.8023	20.7765	26.997	26.8511	26.4572	29.8695	29.4697	30.0802	42.0652	42.083	42.2067	34.7936	34.5422	34.9478	25.1445	25.3248	25.2067	25.903	26.2925	26.3646	24.0688	24.178	24.1064
MPK14	21.2808	20.8185	20.7756	19.439	19.2751	19.3168	21.0337	21.4294	20.5947	20.6962	20.6326	20.4486	20.997	21.2989	21.2914	21.901	21.9948	21.1378	21.7706	21.4917	21.5061	19.6711	19.0898	19.1457	22.4436	22.216	21.8763	26.4132	26.0545	26.0545	36.7569	37.0671	36.9376	26.9773	26.9748	26.373	21.038	21.3806	21.2209	22.9414	23.2739	22.8355	21.3551	21.303	21.4825
MPK16	22.3761	22.5353	21.7925	19.9314	19.7021	19.74	21.0661	20.6933	20.4941	22.1824	22.2046	22.3345	21.7124	21.8603	21.3633	21.0494	21.3562	20.9532	22.9398	23.375	22.9054	20.3409	19.8242	20.5709	22.0726	21.9288	21.9084	29.3598	29.8528	29.6115	37.1743	37.2522	37.9715	30.0594	29.8741	29.687	21.4876	21.3841	22.1395	22.7991	22.9352	22.7132	21.481	21.1501	20.9565
MPK17	21.5873	20.8562	20.917	19.9741	19.7444	19.6556	18.636	17.9552	17.9022	20.671	19.7618	19.7936	22.1092	22.6328	22.2074	20.6278	19.9619	19.9214	23.1663	22.527	22.3859	18.9229	19.7254	19.2514	19.3333	18.9457	18.9656	28.9671	28.7328	28.779	36.7851	36.8779	36.3489	25.4432	25.3867	25.2076	19.4713	19.9392	19.779	22.6951	22.9309	22.9111	20.922	20.9276	20.6885
MPK20-1	23.3804	23.9374	23.9008	22.7302	21.6834	21.5897	20.7555	20.2615	20.4317	22.194	22.6875	22.62	22.5479	22.4515	22.1195	20.8327	20.0712	20.2217	22.4689	21.7582	22.1112	20.8159	19.7646	19.9539	20.6297	20.3822	20.9231	38.4267	38.8507	38.5411	36.9476	36.7741	36.6279	27.027	27.0956	26.8722	20.1558	20.0922	20.3468	21.7375	21.9251	21.7307	19.3035	19.8701	19.4994
MPK20-2	27.9773	27.0887	27.3276	23.1694	23.0181	23.1499	22.8272	21.9786	22.4213	26.7756	26.0482	26.9625	26.2217	26.4227	26.397	22.382	22.9432	22.1407	25.803	26.7403	26.6443	22.2845	22.6262	22.5453	22.9346	22.2978	22.1311	36.3542	36.5741	36.2366	36.8357	36.8146	36.9405	23.5363	23.3662	23.274	22.4159	22.6045	22.4432	22.8694	22.9338	22.6056	22.111	22.0807	21.923
MPK20-3	20.8353	20.6111	20.5107	20.3317	19.5253	19.8285	23.0779	23.2205	22.6373	21.3163	20.7074	20.7183	21.1898	21.1122	21.7693	23.6975	23.8221	23.154	22.2724	21.8477	21.9414	19.7098	19.3828	19.369	23.6763	23.4275	23.376	26.272	26.1323	26.1536	37.8782	36.7154	37.4435	29.2122	28.9745	28.9602	23.3963	23.0068	22.7484	24.5807	24.6883	24.9311	23.5306	23.3527	22.8255
MPK20-4	18.785	18.3191	18.3705	16.7465	16.4998	16.3372	20.4836	20.004	19.7529	18.1459	17.8206	17.834	18.7343	18.7075	18.5263	21.4136	21.2961	20.9772	19.4793	19.2243	18.8532	17.3182	16.7492	16.7171	21.0155	21.4315	21.209	25.7236	25.8199	25.1332	40.3527	40.8255	40.2813	25.3584	25.5437	25.437	21.1736	20.9285	21.5342	22.5223	22.613	22.9359	20.9282	20.9537	21.2443
MPK20-5	23.7422	23.8119	23.694	20.6044	21.0788	20.4899	20.4155	20.4617	20.1934	22.2112	22.6267	22.3145	22.0965	22.6819	22.3013	21.3976	21.9907	21.8776	22.1534	22.4739	22.0921	20.9266	20.794	20.9796	22.5847	22.5568	22.5397	33.1898	32.5616	33.1654	38.2131	38.9117	38.9455	31.8559	31.9509	31.8684	21.9513	22.0802	22.1671	24.961	24.8685	24.8269	23.0604	22.7325	22.911
MPK21-1	25.9705	26.2046	26.1866	25.6918	25.3769	25.181	23.1317	23.5454	23.1428	25.9891	25.8597	26.3124	26.595	26.466	26.3891	23.7014	24.5192	23.8658	28.9526	28.3914	28.435	23.8891	23.9306	23.8433	23.6893	23.8573	23.1084	40.6958	40.9356	41.3013	41.7143	41.9534	41.6275	28.3757	28.1374	28.4323	22.6495	23.2131	22.9117	25.9104	25.328	25.763	23.1213	23.6795	23.3391
MPK21-2	35.4326	35.3239	35.4204	30.021	29.4154	29.1376	27.1586	26.4148	26.1988	30.5106	29.8435	30.8859	34.3184	34.7517	34.7168	25.8036	25.981	25.2498	34.3936	34.1235	35.5417	24.2036	24.4249	24.5582	24.9693	24.8697	24.8379	32.7105	32.8408	32.5766	33.2222	34.003	33.8634	31.4818	31.812	31.1558	23.8228	23.5879	24.1898	26.8438	26.9326	26.6011	25.431	24.4983	24.7268
MKK1	21.702	21.5305	21.3034	19.9244	19.6507	19.8582	20.0168	19.3862	19.6145	22.5162	22.7162	22.4623	22.621	23.2872	22.2982	22.3764	21.9184	21.7435	23.2739	23.0853	23.2162	21.9407	21.4765	21.4572	22.9053	22.3652	22.5085	28.2444	27.8629	28.1161	36.7247	36.9069	37.844	27.9987	27.0966	27.2728	21.851	22.4923	22.181	22.9329	22.9086	22.487	21.0994	21.3703	21.0621
MKK3-1	24.809	24.1842	24.2651	22.2733	22.1323	22.0327	22.239	22.7361	22.6506	23.4485	23.3053	23.0761	24.3592	24.2971	23.9498	22.14	22.1657	22.4818	25.2877	25.2652	25.1017	22.5352	21.9299	21.9136	22.3761	22.7008	22.976	26.9404	26.7906	26.6085	34.5115	34.9175	34.4326	26.9246	26.6948	27.5871	22.9907	22.7087	23.3636	24.1707	24.1263	24.9375	22.2854	22.3935	22.5717
MKK3-2	23.809	23.9886	24.196	21.9516	22.3621	22.1884	23.4711	22.9536	22.6926	23.6111	23.7748	23.9575	23.8716	24.0322	23.9359	23.9602	23.4577	23.2047	24.9285	25.0786	25.1883	22.3467	22.6385	22.3883	23.8091	23.4637	23.4494	27.3117	26.9583	27.0496	37.4881	37.972	38.392	27.9207	28.1071	28.0207	23.5814	23.3791	23.0788	24.9262	24.8994	25.475	23.5636	23.1142	23.2062
MKK3-3	25.0892	24.7178	24.7145	22.2303	22.322	21.7598	21.9682	21.4908	21.7165	25.6915	25.8756	25.9323	25.6378	26.1191	25.3602	23.887	23.209	23.1362	27.4103	26.9488	26.9374	24.1841	24.1376	23.7329	23.9418	23.5018	23.4242	27.918	27.8255	27.8093	33.3936	33.9431	33.3184	27.7352	27.2655	28.7309	24.4019	24.8613	24.3481	25.2676	25.2937	25.9231	23.3672	23.0306	23.2616
MKK4	23.6418	23.3643	23.4072	23.5837	23.0549	22.9516	22.459	22.2566	22.243	23.5201	23.2685	23.1237	25.1802	25.9651	25.1081	23.5362	23.1536	23.0616	24.9598	24.7608	24.8616	23.478	22.8169	22.9673	23.0094	22.5723	22.6575	27.5167	27.8777	27.6929	35.629	35.5117	35.3431	27.9866	27.4742	27.8265	22.449	22.5429	22.5721	25.4388	24.8986	24.9383	22.8444	22.8897	22.7632
MKK5	23.4596	23.3685	23.6035	22.0533	22.1792	21.9625	23.2395	22.6426	23.1435	22.6405	22.5803	22.4603	23.5241	23.8747	23.609	23.7236	23.2864	23.1043	23.4712	23.1755	23.2356	22.0645	21.6473	21.7199	23.4774	22.9878	23.0518	28.0804	27.8958	28.2613	36.846	36.9286	35.6434	28.5518	28.3337	28.0667	23.7051	23.8062	23.9029	25.9357	25.1527	25.009	23.9233	23.1782	23.302
MKK6	18.6353	18.2895	17.9417	16.883	15.7011	15.8842	22.9425	22.2785	21.2446	17.6335	17.2798	17.2754	17.3628	17.9027	17.7496	22.2628	22.5524	21.7436	20.7481	19.4607	19.5368	15.8022	15.269	15.2814	22.381	22.0822	22.5659	26.6836	27.935	27.313	35.0481	35.087	35.8714	27.538	27.6555	27.3267	22.5835	22.8039	21.8437	22.9008	22.6431	22.941	22.2638	22.34	21.5072
MKK10-1	39.5089	40.0101	39.1237	34.0973	34.6845	34.9419	39.3941	39.1212	39.2702	34.4882	34.1603	34.961	34.2925	34.9988	34.8876	35.625	35.312	36.0028	36.2237	36.1972	36.9675	34.0069	34.9624	34.2199	38.0039	37.9159	38.6273	37.6881	37.6256	37.3496	35.0063	35.807	35.6319	33.7365	32.952	32.499	38.9909	38.69	38.2736	41.4406	41.9498	41.3169	39.7039	39.9486	39.6039
MKK10-2	20.1292	20.0815	20.0041	18.4151	18.3091	18.2715	18.9184	18.8326	18.5626	21.4585	21.4994	21.5225	22.4814	22.3921	22.5913	22.4376	22.3196	22.0089	23.2498	23.2044	23.2559	20.9148	20.9104	21.0243	21.9988	22.0536	21.916	27.1653	27.8426	26.6661	34.9382	34.8924	34.9046	25.9631	25.3926	25.1252	21.899	22.2086	22.5687	24.3424	24.3592	24.9442	20.9633	20.9331	20.558
MKK10-3	35.4194	35.3086	35.104	34.036	34.3151	34.5717	36.9143	37.4654	37.8038	34.3163	34.8221	34.7114	34.7536	34.1184	34.7191	37.5712	37.1634	37.7153	35.78	35.2947	35.1043	34.1555	34.0102	33.6678	38.0856	38.7283	38.9849	31.9888	31.9745	32.707	35.7452	36.3457	35.9741	38.3782	38.9607	38.6164	36.7488	36.115	36.552	34.8945	34.9317	34.297	37.2543	38.2904	37.6304
MKK10-5	29.7959	29.6134	29.6123	28.9191	28.0509	28.1158	31.7114	31.1055	32.4618	28.021	27.8904	27.6054	30.1805	30.8069	29.8163	29.9618	30.9509	30.0843	30.775	29.9928	30.1269	28.8728	28.2619	27.9906	29.9455	30.2894	29.5279	30.3594	30.7233	30.4036	40.9074	41.0523	40.6532	31.7379	31.9263	31.6954	29.2644	29.3201	29.0827	30.9315	30.9058	31.33	29.4531	30.0279	30.2842
	Control									40 ℃ 3 h									40 ℃ 6 h									200 mM NaCl 3 h									200 mM NaCl 6 h									20% PEG 3 h
	Bd21			TR8i			Bd30-1			Bd21			TR8i			Bd30-1			Bd21			TR8i			Bd30-1			Bd21			TR8i			Bd30-1			Bd21			TR8i			Bd30-1			Bd21			TR8i
Actin	21.3194	21.408	21.3583	19.8837	19.927	19.9465	20.9866	21.0251	20.7442	21.5437	21.5308	21.4844	19.8152	19.7827	19.7922	21.2434	21.2366	21.1241	21.6771	21.5913	21.6159	21.19	21.2598	21.1495	21.4157	21.4185	21.386	20.6889	20.6456	20.7309	19.7668	19.6724	19.6204	20.1486	20.1788	20.1654	20.3717	20.2702	20.2945	20.1896	20.2414	20.2045	19.8814	19.7804	19.8365	21.0135	20.9638	20.9544	20.2508
MPK3	22.3833	22.3377	22.3557	21.6491	21.7161	21.6894	22.8887	22.9185	22.8908	23.5585	23.2991	23.2421	22.9136	22.9252	22.9454	24.3184	24.2451	24.3365	23.3315	23.3099	23.3503	23.9445	23.9136	23.9197	24.2889	24.2122	24.2178	20.9125	20.9098	20.9038	21.0084	20.996	20.96	20.8712	20.8817	20.8277	21.9685	21.5869	21.6041	21.4398	21.3696	21.3999	21.8004	21.8396	21.6878	21.8819	21.8265	21.8066	20.72
MPK4	21.6054	21.6527	21.5736	20.8233	20.8933	20.8207	21.5366	21.5335	21.4469	21.6489	21.619	21.6238	20.6004	20.541	20.5939	21.6592	21.5898	21.4711	21.7069	21.7738	21.7395	21.6059	21.5991	21.602	21.8475	21.9424	21.8097	21.4129	21.3131	21.3897	20.7688	20.8146	20.7193	21.0036	20.984	20.9784	21.4129	21.3131	21.3897	20.7688	20.8146	20.7193	21.0036	20.984	20.9784	21.9517	21.921	21.9159	21.2679
MPK6	21.9215	21.8824	21.6888	21.7699	21.8251	21.6314	21.9503	21.9156	21.9436	21.1273	21.1088	21.1019	20.1999	20.1478	20.1419	20.6465	20.503	20.6135	21.068	21.1113	20.9707	21.1059	21.0835	21.0264	20.5347	20.4679	20.4212	20.6466	20.6102	20.618	20.7098	20.6283	20.6381	20.1265	20.1197	20.2503	20.6141	20.6278	20.4203	20.4271	20.5308	20.4711	19.9282	19.7904	19.9189	21.5771	21.6028	21.6754	20.6955
MPK7-1	22.8988	22.9208	22.9298	22.1733	22.1979	22.1152	22.8221	22.7811	22.8672	21.9661	21.9959	22.0692	20.5913	20.4467	20.6096	21.6827	21.4669	21.5898	21.9345	22.0429	22.0052	21.2399	21.2443	21.2532	21.8346	21.913	21.9436	21.2279	21.2118	21.1973	20.3608	20.3221	20.3459	20.9214	20.6716	20.7853	21.0559	20.9686	20.9597	20.5804	20.5826	20.6101	20.7573	20.7291	20.6754	22.138	22.1498	22.3569	20.6842
MPK11	24.8336	24.9478	24.9088	24.8046	24.8332	24.6854	24.7099	24.6872	24.829	24.747	24.7979	24.7538	24.9164	24.8824	24.8821	24.2588	24.4401	24.4008	24.9671	24.8608	24.8711	25.9922	25.9861	25.9572	24.6257	24.5402	24.4669	23.9399	23.9789	24.0012	25.1626	25.1083	25.1744	23.3012	23.3531	23.3251	23.9594	23.9104	23.8179	25.0451	25.0095	24.9687	23.207	23.1468	23.2194	24.5105	24.4421	24.4305	25.3251
MPK14	21.5165	22.1688	22.1573	22.6141	22.5084	22.5074	22.6336	22.7585	22.6533	21.956	21.9802	21.9319	21.7766	21.7544	21.7215	22.4883	22.4312	22.4316	21.8724	21.8785	21.8017	22.4617	22.4475	22.47	22.5211	22.5871	22.5799	22.1958	22.3131	22.2751	22.8465	22.9103	22.881	22.6062	22.7754	22.8432	21.9672	21.8825	21.9895	22.6557	22.6758	22.6126	22.6227	22.5437	22.5225	23.0109	23.0552	23.02	22.9722
MPK16	22.3489	22.398	22.0895	21.7289	21.7646	21.6642	22.6053	22.6377	22.4392	22.758	22.7161	22.5286	20.7828	20.7516	20.7262	22.1065	22.0227	22.0322	22.5691	22.5377	22.5068	21.6283	21.606	21.5929	22.0628	22.1113	22.0309	20.3703	20.3375	20.3287	21.1124	21.0036	21.031	20.3851	20.3967	20.3062	20.4643	20.4287	20.3026	21.0003	21.0056	20.9689	20.3086	20.3007	20.2389	21.1564	21.0998	21.1379	20.8698
MPK17	19.887	19.6395	19.8007	20.9836	20.9648	20.9843	21.8706	21.581	21.456	19.2285	19.2114	19.2536	20.4093	20.3345	20.3991	20.4996	20.4451	20.4588	19.1657	19.144	19.0875	20.7997	20.8148	20.8111	20.5824	20.5234	20.3806	17.8007	17.6851	17.7345	19.411	19.3388	19.3646	18.6342	18.4598	18.4816	18.0103	17.9872	17.9432	19.8027	19.7415	19.7379	19.3373	19.2585	19.3455	18.1504	18.1016	18.241	19.3743
MPK20-1	21.9847	22.064	21.8846	21.3614	21.4114	21.3073	22.653	22.653	22.5472	20.5463	20.3818	20.4146	19.5382	19.4586	19.4493	20.7291	20.8041	20.6519	20.6372	20.516	20.3886	20.5992	20.6508	20.6142	20.6294	20.8291	20.7021	20.3462	20.2711	20.236	20.4274	20.3804	20.4588	20.8245	20.7668	20.7607	20.3169	20.3326	20.1875	20.7349	20.6661	20.6631	20.8864	20.8663	20.8212	21.7483	21.6596	21.5313	20.891
MPK20-2	22.6871	22.6465	22.6257	21.972	21.9271	21.9673	21.9367	21.933	21.902	22.2728	22.2474	22.2499	20.5138	20.4382	20.5002	20.8011	20.8156	20.743	22.2546	22.2266	22.2054	21.4311	21.382	21.4006	21.2065	21.2095	21.2489	20.5338	20.5903	20.5445	20.9318	20.9467	20.9627	19.7301	19.8074	19.7849	20.5086	20.4814	20.4133	21.3895	21.3256	21.356	19.3136	19.327	19.3182	21.4019	21.3939	21.3941	20.8643
MPK20-3	22.4543	22.5182	22.4564	21.5396	21.4866	21.4762	22.7416	22.8222	22.6304	20.8431	20.8647	20.836	20.2628	20.1746	20.235	21.3183	21.1963	21.1859	21.1104	21.0974	21.0804	20.7435	20.7566	20.7069	21.4073	21.4642	21.4107	20.5211	20.4496	20.5793	20.2	20.1988	20.1516	20.6722	20.5701	20.6562	20.3613	20.4112	20.3736	20.2568	20.2124	20.2177	20.6488	20.6401	20.6256	20.9358	20.9078	20.9526	20.5146
MPK20-4	20.921	20.8115	20.7106	20.7981	20.8032	20.9112	21.0564	21.0879	21.0511	20.5473	20.3944	20.4538	20.1339	20.0369	20.1496	19.4387	19.3559	19.3946	20.5183	20.4618	20.3601	21.4162	21.4255	21.413	20.2002	20.2067	20.2287	19.0464	19.0388	18.9262	20.1524	20.1742	20.1807	18.6641	18.6552	18.7336	19.4186	19.3557	19.1568	20.5505	20.5386	20.5481	19.4998	19.5151	19.4864	19.6685	19.7352	19.6362	20.5565
MPK20-5	22.9172	22.9008	22.7953	22.9214	22.9385	22.8467	23.2705	23.3312	23.2785	21.9415	21.8849	21.9233	22.6524	22.5038	22.5218	21.7667	21.769	21.6833	21.9478	21.9723	21.9322	22.5686	22.5056	22.3991	22.4052	22.3942	22.4302	21.3182	21.3594	21.2169	21.2766	21.4715	21.5312	19.917	20.0076	19.9436	21.1784	21.0058	21.0486	21.7299	21.6676	21.7035	21.2841	21.3036	21.1688	21.4397	21.4331	21.496	20.9917
MPK21-1	25.4935	25.4363	25.4358	25.5713	25.5434	25.5527	24.5569	24.5798	24.3184	24.6537	24.6653	24.5244	25.3537	25.3653	25.2244	23.5412	23.5036	23.3955	24.6342	24.5096	24.4646	25.3342	25.2096	25.1646	23.7395	23.6195	23.6524	23.9293	23.9557	23.9267	24.6293	24.6557	24.6267	22.8524	22.7748	22.9329	23.7392	23.722	23.5879	24.4392	24.422	24.2879	22.9022	23.0114	22.8339	23.7909	23.8669	23.6687	24.4909
MPK21-2	25.8527	25.6876	25.6771	27.2679	27.2515	27.1946	26.1839	26.1469	26.0675	24.9683	23.9404	24.183	25.1139	24.8729	25.1155	24.7442	24.7728	24.7295	23.9209	23.8445	23.8886	25.1534	25.277	25.1211	24.5021	24.5604	24.5654	23.9369	23.9189	23.8548	24.8695	24.8515	24.7874	24.4592	24.4018	24.4693	23.3591	23.3972	23.4042	24.2916	24.3298	24.3368	24.3902	24.4134	24.4227	24.1288	24.0486	24.0728	25.0613
MKK1	22.5508	22.4083	22.4703	22.3909	22.3545	22.2455	21.9214	21.9621	21.9451	22.7211	22.7492	22.5703	22.3986	22.3596	22.2437	22.6611	22.7448	22.7274	22.9336	22.9454	22.9403	22.9264	22.9212	22.9307	22.9347	22.8606	22.9478	22.2808	22.3301	22.3326	22.352	22.3571	22.2746	22.0732	22.0985	22.1257	22.3708	22.1812	22.1947	22.4258	22.3371	22.3293	22.0937	22.1385	22.0718	22.8344	22.7992	22.9157	22.6602
MKK3-1	24.1672	24.1311	24.0337	23.93	24.1895	23.9555	23.7014	23.9444	23.9427	24.2286	24.2318	24.1136	24.0345	24.0218	24.0732	23.5357	23.5545	23.5047	24.7568	24.5902	24.5594	24.9257	25.1212	25.0822	23.8229	23.5555	23.9518	22.7646	22.7279	22.7477	23.7711	23.7306	23.6428	22.4636	22.4621	22.4842	22.5173	22.412	22.3903	23.7404	23.7047	23.6464	22.0209	22.0267	22.0334	23.5847	23.5701	23.5838	23.7087
MKK3-2	23.8742	23.7647	23.5865	23.078	23.1105	23.0178	24.2234	24.2255	24.0844	23.1342	23.0513	23.0559	21.7084	21.6397	21.8115	23.0904	23.1491	23.1215	22.5551	22.7181	22.7149	22.4468	22.4141	22.4159	23.3661	23.324	23.3866	22.3348	22.3252	22.2732	22.1001	22.2849	22.3332	22.9556	22.8491	22.9228	21.9704	22.0495	21.9885	22.0701	22.0965	22.0727	23.0886	22.9539	22.9148	23.2402	23.1255	23.2039	22.2148
MKK3-3	24.3757	24.4709	24.2853	23.6625	23.6443	23.5968	24.459	24.442	24.4113	23.3033	23.1416	23.028	22.9013	22.8024	22.7648	23.2701	23.0969	23.1592	24.0079	23.8655	23.707	23.9707	23.9402	23.9145	23.4771	23.406	23.3426	22.8994	22.7922	22.7753	22.9091	22.9672	22.9539	21.8892	21.986	21.9198	22.84	22.6281	22.5033	22.7963	22.7506	22.71	21.6762	21.5533	21.5635	23.106	22.8917	22.8503	23.7372
MKK4	22.3304	22.304	22.1979	22.2642	22.5649	22.4704	23.4056	23.2365	23.2295	21.9414	21.7266	21.7736	22.1508	21.7646	21.6936	22.627	22.4506	22.5314	21.8064	21.7529	21.7828	23.4883	23.1996	23.2649	22.8444	22.78	22.7722	20.3043	20.2931	20.3394	21.4062	21.2792	21.3531	21.4722	21.4473	21.3391	20.8433	20.7952	20.7913	21.8664	21.8419	21.8047	21.7716	21.7943	21.7607	21.6141	21.6499	21.623	21.3585
MKK5	23.5623	23.4839	23.3002	22.9961	22.927	22.8985	24.3097	24.3419	24.177	22.5057	22.4273	22.2436	22.9471	22.9746	22.9455	23.4017	23.3732	23.4217	22.8672	22.6066	22.5781	23.6176	23.6661	23.7719	23.447	23.4493	23.3791	22.6233	22.5911	22.5384	22.2223	22.1142	22.1722	22.2479	22.139	22.1636	21.1063	21.107	21.0799	22.2175	22.294	22.1565	22.0778	22.062	22.0455	21.7836	21.7837	21.8545	22.2544
MKK6	22.8534	22.7253	22.7096	21.4789	21.4589	21.3753	33.9712	33.5851	34.0497	21.693	21.5213	21.6005	19.2627	19.1718	19.2546	31.9633	31.3037	31.652	21.4253	21.4684	21.4626	20.2829	20.3415	20.2944	31.9391	32.3118	32.1528	20.5253	20.4204	20.4729	19.9102	19.9284	19.9494	32.3292	31.4195	31.8397	19.8924	19.9087	19.936	19.9957	20.0438	19.9948	31.6531	31.0744	31.4924	21.2836	21.0477	21.1597	20.0621
MKK10-1	35.0154	35.9975	35.8604	33.7749	33.1359	33.405	33.4077	33.2693	33.5963	35.1374	35.8432	35.9829	32.3269	32.3101	32.5737	33.6736	33.8783	33.499	34.0177	33.8396	33.4417	34.2617	34.6321	33.7613	33.1242	33.6072	33.4011	32.9034	32.4898	32.6077	31.6267	32.8693	32.5393	30.293	30.3927	30.2839	32.9316	33.1718	33.8342	32.3449	32.5808	32.4668	30.4991	29.4116	30.41	33.4917	34.6308	32.6114	31.8382
MKK10-2	22.941	22.9339	22.9189	22.2231	22.282	22.2309	22.2539	22.2516	22.1471	22.3403	22.3005	22.2392	21.2484	21.2339	21.2156	21.6807	21.5978	21.6034	21.7135	21.7387	21.7602	22.5341	22.551	22.5369	21.3667	21.3976	21.2827	21.7135	21.7387	21.7602	21.0203	21.0711	21.1043	21.0345	20.9932	21.0053	21.8219	21.7571	21.7658	20.9143	20.9106	20.8814	20.0471	20.0057	20.0179	22.7395	22.7068	22.6359	21.4355
MKK10-3	33.3246	33.1251	33.7548	30.7185	30.5928	30.7429	31.2162	32.2195	31.1531	33.1798	33.775	33.0689	29.536	29.5123	29.3302	29.6918	30.0201	29.6561	32.1733	32.3959	31.9032	31.1222	31.5541	31.138	29.8817	30.4812	29.5085	31.5391	31.1162	31.3389	30.3666	30.0094	29.502	29.5192	30.78	30.1315	30.9316	30.8436	31.5515	30.7543	30.1621	30.0241	29.0412	29.1204	29.1655	32.1262	32.1842	32.2873	30.584
MKK10-5	26.9907	26.9361	26.9946	26.9386	26.9723	26.941	27.3012	27.2833	27.1279	30.7397	31.0276	30.789	29.0958	29.1405	29.1373	30.5883	30.3535	30.645	31.2097	31.2193	31.021	29.8526	29.9303	29.787	29.7648	29.4565	29.79	27.5663	27.6669	27.7338	28.1347	28.1332	28.2025	28.0063	27.836	28	28.2626	28.1941	28.3913	28.2505	28.0302	28.2623	29.4213	29.5973	29.2728	28.0616	28.072	28.0979	28.0577
[truncated: 14 more columns]

## Sheet: result
	Gene name	MPK3	MPK4	MPK6	MPK7-1	MPK11	MPK14	MPK16	MPK17	MPK20-1	MPK20-2	MPK20-3	MPK20-4	MPK20-5	MPK21-1	MPK21-2	MKK1	MKK3-1	MKK3-2	MKK3-3	MKK4	MKK5	MKK6	MKK10-1	MKK10-2	MKK10-3	MKK10-5
root	Bd21	0.770639	1.54354	-1.468	-0.690593	-1.60046	2.03195	-1.40203	-0.620315	-10.4002	-8.18229	2.02004	2.64708	-4.76628	-12.7716	-4.50333	0.131535	1.42618	1.09948	0.355085	0.510235	0.126806	0.895447	-9.34843	0.981343	-4.01742	-2.28944
	TR8i	-6.53281	-2.30917	-8.11093	-8.01914	-14.8812	-9.68348	-10.229	-9.43359	-9.54613	-9.62651	-10.1087	-13.2494	-11.453	-14.528	-6.45914	-9.92144	-7.38349	-10.7136	-6.31463	-8.25751	-9.23559	-8.09842	-8.24464	-7.67468	-8.78458	-13.6339
	Bd30-1	-2.87922	-10.2631	-15.6849	-5.07879	-8.09955	-0.113395	-3.21185	1.31579	-0.336615	3.26948	-2.38732	1.21527	-5.2301	-1.65349	-4.82154	-0.794353	-0.407207	-1.35454	-1.2489	-1.10079	-1.65576	-0.845071	-6.40083	1.16805	-11.9901	-5.12489
stem	Bd21	-3.3606	-3.94702	-3.90111	-4.28615	-3.66916	-2.63156	-4.11549	-3.73517	-3.15486	-7.43799	-3.06259	-0.227724	-3.28192	-9.63511	-15.7284	-4.23386	-6.26029	-6.10723	-8.14095	-5.90284	-4.33619	-0.957336	-17.5049	-4.2788	-16.4351	-11.3404
	TR8i	-5.30716	-4.10125	-3.58882	-5.51223	-4.82503	-3.18484	-4.12801	-3.18257	-4.06079	-6.368	-3.36988	-0.810829	-4.78275	-7.77031	-8.27824	-5.5075	-6.0089	-6.34052	-7.90087	-6.97009	-5.69325	0.666451	-18.2791	-4.8325	-17.8271	-12.2578
	Bd30-1	-4.43118	-0.889908	-2.70984	-2.78273	-5.97041	-1.38061	-1.17193	1.71651	0.15303	-1.65648	-2.69522	-0.420636	-1.76239	-2.75361	-4.09427	-1.79494	-1.8863	-2.77603	-2.82459	-1.94833	-2.37432	-1.54499	-17.3843	-1.19144	-17.8016	-9.12288
leaf blade	Bd21	-2.19495	-3.94299	-2.59145	-4.72974	-2.1699	-2.00733	-3.28364	-2.16919	-4.78857	-8.51353	-1.70136	0.459477	-4.79838	-7.16957	-16.4413	-2.56098	-5.46844	-5.04688	-5.8895	-4.52011	-4.52617	0.662158	-20.5966	-1.12061	-16.3263	-10.7229
	TR8i	-3.08418	-4.66292	-4.41761	-6.60206	-3.69932	-3.50918	-3.95675	-3.95692	-6.16665	-7.27802	-4.06073	-0.693393	-4.88991	-9.58212	-13.6902	-3.97663	-6.31166	-6.3329	-6.26959	-7.36226	-6.23058	-0.321679	-18.7401	-2.49741	-18.4732	-12.5275
	Bd30-1	-2.06578	-0.394153	-1.08275	-2.89061	-2.54254	-0.193141	0.0749626	2.66168	0.343243	-1.58291	-2.15248	0.745948	0.469254	-2.44717	-5.76462	1.1536	-1.71574	-2.21297	-0.899043	-1.49337	-2.1824	-1.32906	-18.4357	2.05491	-16.5684	-10.9334
leaf sheath	Bd21	-2.32258	-3.30138	-2.32433	-4.3224	-2.92958	-2.00937	-3.6574	-1.49233	-3.9174	-8.01233	-2.33088	0.6496	-3.80103	-7.4706	-11.8302	-3.98178	-4.69354	-5.19802	-7.25	-4.72099	-3.97724	1.18687	-15.9534	-2.91034	-16.0335	-9.25584
	TR8i	-4.80207	-4.67036	-4.70205	-5.80512	-5.09288	-3.77623	-4.22578	-4.89694	-4.9534	-8.9276	-3.93754	-1.23647	-4.94039	-9.06385	-17.1761	-5.31596	-6.7825	-6.52702	-8.28617	-7.99826	-6.24975	-0.252177	-17.3067	-5.06873	-17.1108	-12.8484
	Bd30-1	-5.67153	-0.204807	-1.29579	-3.09879	-4.00471	-0.415414	0.142883	1.09207	0.887237	-1.22619	-2.29541	0.0334886	-0.492827	-2.76635	-4.4157	-0.750294	-1.00006	-2.27841	-2.1483	-1.98804	-2.10899	-0.923814	-14.3842	-0.992952	-16.2208	-9.06989
spikelet	Bd21	-5.72612	-2.32728	-2.86268	-4.63482	-5.21178	-1.19961	-1.65687	0.283711	-0.184734	-2.47432	-3.03693	-1.19855	-2.05261	-2.9112	-3.85326	-2.16124	-3.00743	-3.33288	-4.52359	-2.50773	-3.79116	-2.39681	-18.6379	-2.21188	-16.4584	-9.20885
	TR8i	11.2738	13.3547	12.3006	11.3728	9.88739	13.0572	13.2582	13.2284	14.2763	13.2712	11.3407	13.3837	11.1886	10.4069	9.28156	13.298	11.6626	10.9739	10.5793	10.9821	10.7083	13.2458	-5.49502	11.5255	1.36634	5.01827
	Bd30-1	-4.59059	-2.31394	-1.89414	-3.81755	-3.86881	-1.13129	-0.946931	-0.597119	0.691253	-1.7893	-2.98736	-0.793134	-2.65239	-3.13106	-4.63647	-0.928363	-2.16795	-3.04574	-2.97089	-2.58349	-3.21893	-1.78809	-19.5032	-0.569215	-17.4761	-9.6728
40 ℃ 3 h	Bd21	-0.849957	0.137719	0.875925	1.06378	0.288176	0.149225	-0.231071	0.702261	1.68794	0.554125	1.78608	0.506924	1.11221	0.998411	1.53298	-0.0459824	0.0770472	0.819018	1.37743	0.621262	1.2143	1.31556	0.127652	0.795672	0.218003	-3.72059
	BdTR8i	-1.36554	0.144969	1.45654	1.49057	-0.241566	0.670077	0.843355	0.474225	1.75565	1.34904	1.15434	0.608317	0.220475	0.118909	2.08152	-0.126018	-0.140514	1.22653	0.689376	0.441148	-0.137548	2.08566	0.912689	0.89034	1.10285	-2.29628
	Bd30-1	-1.11791	0.215024	1.63153	1.52639	0.658183	0.514203	0.789684	1.45073	2.17213	1.42009	1.78064	1.95148	1.83643	1.28769	1.66665	-0.485535	0.61395	1.3402	1.5448	1.03689	1.16006	2.51172	0.0235691	0.872962	2.02299	-3.00873
40 ℃ 6 h	Bd21	-0.70546	0.136692	1.04711	1.18852	0.263257	0.362903	0.00713921	0.909482	1.73008	0.690423	1.64645	0.633862	1.18651	1.18528	2.12071	-0.197044	-0.258616	1.34534	0.783409	0.76293	1.03105	1.57692	2.12432	1.46003	1.51028	-3.90998
	BdTR8i	-0.960364	0.524141	1.95086	2.19702	0.0766258	1.36428	1.39087	1.44971	2.01937	1.83162	2.04587	0.699979	1.69178	1.60033	3.33482	0.684905	0.26269	1.92384	0.973456	0.396291	0.536016	2.41213	0.500963	0.985374	0.694007	-1.62528
	Bd30-1	-0.852112	0.127239	1.95003	1.41453	0.685886	0.607257	0.980558	1.62852	2.38566	1.19041	1.79217	1.34138	1.37164	1.3027	2.07826	-0.483387	0.574233	1.30699	1.51703	0.979764	1.3392	2.22224	0.535097	1.35668	2.06062	-1.94477
200 mM NaCl 3 h	Bd21	0.776756	-0.434759	0.532525	1.03072	0.249961	-0.987212	1.25988	1.36218	1.01996	1.42342	1.28621	1.13714	0.899516	0.844543	1.16215	-0.511442	0.690516	0.757291	0.881575	1.29172	0.191086	1.61647	2.28404	0.520377	1.39668	-1.3553
	BdTR8i	0.464171	-0.154332	0.850798	1.58662	-0.60655	-0.568496	0.437696	1.37354	0.705324	0.775897	1.08481	0.435845	1.24322	0.686	2.16933	-0.230148	0.0776087	0.59682	0.458605	0.854475	0.538468	1.27583	0.860986	0.947582	0.492872	-1.43873
	Bd30-1	1.28482	-0.237327	1.01664	1.27635	0.661212	-0.814152	1.44371	2.35633	1.07937	1.39542	1.34423	1.62647	2.58292	0.877268	0.934949	-0.910627	0.638515	0.514263	1.75143	1.11663	1.33835	1.25153	2.34693	0.45217	0.631695	-1.46432
200 mM NaCl 6 h	Bd21	-0.410777	-0.710729	0.227025	0.871925	-0.0489935	-1.04869	0.830455	0.745645	0.648972	1.13551	1.04445	0.454222	0.743678	0.722343	1.30248	-0.822198	0.620947	0.689164	0.670386	0.417685	1.30121	1.8006	1.26209	0.0998431	1.24279	-2.35867
	BdTR8i	0.574558	0.199891	1.55854	1.86389	0.0594838	0.188066	1.02044	1.50966	0.964811	0.891241	1.56462	0.584565	1.49465	1.46553	3.21139	0.259057	0.62066	1.28178	1.17506	0.888345	1.01068	1.71906	1.26726	1.63603	0.664045	-0.937596
	Bd30-1	0.0375829	-0.41344	0.971476	1.01702	0.465124	-0.967006	1.19215	1.23624	0.673917	1.51846	1.00739	0.478849	0.955329	0.483307	0.638146	-1.24433	0.749939	0.106167	1.75393	0.429083	1.12858	1.37617	2.2317	1.10813	1.3347	-3.27886
20% PEG 3 h	Bd21	0.135838	-0.703647	-0.172218	0.31693	0.0510393	-1.46582	0.762767	1.22665	-0.0532446	0.871746	1.15954	0.749727	1.03015	1.29503	1.27105	-0.822198	0.146423	0.167258	1.04332	0.263742	1.25683	1.21445	1.66181	-0.147505	0.817608	-1.48807
	BdTR8i	1.29969	-0.114985	1.37421	1.78587	-0.199605	-0.11025	1.05421	1.90426	0.831435	1.42876	1.27547	0.567575	2.23156	1.38521	2.52695	0.259057	0.597386	1.08151	0.245592	1.36902	0.947237	1.65831	1.67731	1.14719	0.375196	-0.864017
	Bd30-1	0.0956802	-0.634697	0.644535	0.483726	0.0542281	-1.3339	1.13816	1.05841	0.659826	1.27129	1.00317	1.1587	1.53479	0.618409	0.870517	-1.24433	0.295808	-0.0545095	0.976124	0.722537	1.15733	1.34645	0.969663	1.35872	0.475349	-1.69269
20% PEG 6 h	Bd21	-0.3919	-1.1041	-0.311681	0.23045	-0.412468	-1.29739	0.396302	-0.0561613	-0.103365	0.138445	0.606881	0.0537579	0.0193609	0.639222	1.05411	-1.10287	0.0887647	0.124565	1.06568	0.0365632	0.48204	1.51881	2.02436	0.184693	0.520814	-1.52315
	BdTR8i	0.868672	-0.225269	0.621646	1.16356	-1.1192	-0.244352	0.418767	0.968153	0.322956	0.318892	0.976127	-0.319693	1.09837	0.282884	1.8635	-0.1806	0.370926	0.667211	0.497965	0.926585	0.459934	2.05382	1.65096	1.41198	0.30335	-0.751416
	Bd30-1	0.258338	-0.448112	0.919896	1.03893	0.710612	-0.619638	1.26927	1.44149	0.944391	1.15423	1.09774	1.29103	1.32838	0.827949	1.19934	-1.17142	0.783542	0.652601	1.53422	0.613307	1.09167	1.45556	1.35274	1.24208	1.21309	-1.36035
